# Supplementary material
Source: PubMed Central journal article supplement (PMC6495366)
Supplement: jamasurg-154-e190972-s001.pdf [file jamasurg-154-e190972-s001.pdf]

1 **Vein-first surgical technique reduces the dissemination of circulating tumor**  
2 **cells with potential survival benefits in patients with non-small cell lung cancer**  
3 **A prospective, multi-center, randomized, controlled trial combined with**  
4 **retrospective propensity score matching analysis based on a lung cancer**  
5 **registry**

6

7 **Background**

8 Recently, some studies have demonstrated that the presence of circulating tumor  
9 cells (CTCs) in the peripheral blood can be a surrogate biomarker to predict  
10 recurrence and prognosis.<sup>1-4</sup> CTCs are released from the primary tumor into the  
11 bloodstream and have the potential to spread to distant sites and develop into  
12 micro-metastatic deposits.<sup>5</sup> Numerous studies have demonstrated that surgical  
13 manipulation could promote the dissemination of tumor cells into the circulation.<sup>6-10</sup> A  
14 surgical technique, named “no-touch” isolation, has been reported to reduce  
15 intraoperative shedding of tumor cells into the circulation in colorectal cancer,<sup>11-14</sup>  
16 hepatocellular carcinoma<sup>15,16</sup> and pancreatic cancer.<sup>17-19</sup> In addition, another surgical  
17 technique that may prevent the dissemination of tumor cells into the bloodstream is to  
18 ligate the drainage veins first during surgery.<sup>20</sup> As reported by McCulloch and  
19 colleagues<sup>21</sup>, tumor cells can be detected in venous blood during surgery. For lung  
20 cancer, vascular invasion within the tumor is common, which might be responsible for  
21 the high incidence of hematogenous spread of tumor cells.<sup>22-24</sup> Surgical manipulations  
22 of lung cancer may squeeze the tumor and further promote the spread of tumor cells

23 into the circulation.<sup>9,10</sup> The potential risk of tumor cell dissemination can theoretically  
24 be minimized if the drainage veins were ligated first (the venous-first technique).  
25 However, this technique has not yet been widely accepted as a standard of surgical  
26 oncology in the current guidelines due to the lack of sufficient evidence. As such, we  
27 conducted a prospective, multi-center, randomized, controlled trial to evaluate  
28 whether the order of vascular ligation could affect the dissemination of tumor cells into  
29 the circulation.

30

### 31 **Study protocol**

#### 32 *Purpose*

33 To compare the impact of different sequence of vessel ligation during surgery on the  
34 dissemination of tumor cells and survival outcomes in non-small cell lung cancer  
35 (NSCLC).

#### 36 *Study setting*

37 This trial is a prospective, multi-center, randomized, controlled trial.

#### 38 *Research sites*

39 West China Hospital of Sichuan University, Daping Hospital of the Third Military  
40 Medical University, and Sichuan Cancer Hospital of the University of Electronic  
41 Science and Technology of China.

#### 42 *Eligibility criteria*

43 Inclusion criteria: patients with primary lung cancer; elder than 18 years old; tumor  
44 size more than 2cm; undergoing complete video-assisted thoracic lobectomy.

45 Exclusion criteria: patients undergoing segmentectomy or wedge resection; receiving  
46 a wedge resection of the lesion prior to the standard lobectomy; history of other  
47 malignant tumors; receiving neoadjuvant therapy; undergoing lobectomy with open  
48 thoracotomy.

#### 49 *Randomization and masking*

50 Patients were randomly assigned in a 1:1 ratio according to different surgical  
51 procedures, including the vein-first procedure (ligating the pulmonary vein first, V-first)  
52 and artery-first procedure (ligating the pulmonary artery first, A-first) via computer  
53 generated randomized numbers, and both of the laboratory investigators and the  
54 patients were masked as to the allocation schedule. Sealed and numbered envelopes  
55 that contained the allocated group were prepared and opened at the beginning of  
56 surgery.

#### 57 *Sample size*

58 Sample size was calculated based on our preliminary study. The preliminary results  
59 showed that the increasing of FR<sup>+</sup>CTCs after surgery were observed in 40% patients  
60 in V-first group and 80% patients in A-first group. We expected that there would be at  
61 least 10% differences of the FR<sup>+</sup>CTCs increasing rates between the two groups. And  
62 to achieve a statistical power of 80% and a two-sided type I error of 5%, 36 patients  
63 were needed in each group. With an assumption of an approximate 10% drop out rate,  
64 our aim was to enroll 80 patients.

#### 65 *Procedure and intervention*

66 Before randomization and surgery, patients usually received physical examination,

67 laboratory tests, chest and upper abdominal computed tomography (CT) scan, brain  
68 magnetic resonance imaging (MRI), single-photon emission tomography computed  
69 tomography (SPECT) bone scan, or positron emission tomography CT (PET-CT) as  
70 an alternative to try to find out distant metastasis. Generally, surgical resection is not  
71 considered for patients with distant metastasis.

72 Thoracoscopic lobectomy was performed with the standard technique, with the only  
73 difference being the sequence of vessel ligation. For V-first technique, the pulmonary  
74 veins in the hilum of pulmonary lobes were dissected and transected firstly, followed  
75 by the bronchus and PA branches, and leaving the fissure finally, which was described  
76 as the single-direction thoracoscopic lobectomy.<sup>25</sup> For A-first technique, all arteries  
77 should be completely ligated before venous interruption. Taking the right upper  
78 lobectomy as an example, there were often multiple arteries that required ligation first.  
79 The apicoanterior trunk of the right upper artery was fully exposed from the anterior  
80 aspect of hilum, a stapler was used to divide this branch. Then the upper lobe of lung  
81 was pulled forward, and the upper lobar bronchus was dissected through the posterior  
82 approach. After the upper lobar bronchus was transected, the posterior ascending  
83 branch of the right upper artery was exposed and ligated. The remaining right upper  
84 lobe veins were transected finally. All operations were carried out by certified thoracic  
85 surgeons who had at least three-year experience of thoracoscopic lobectomy. Three  
86 milliliters of peripheral blood was sampled from radial artery in all the enrolled patients  
87 before and after surgery, using an EDTA anti-coagulant vacuum tube (BD Diagnostics,  
88 Sparks, MD). Preoperative blood samples were collected from patients before making

89 the incision. Postoperative blood samples were harvested immediately after the chest  
90 closed. Samples were then stored at 4°C and processed within 24 hours.

#### 91 *CTCs detection*

92 CTCs are analyzed and quantified using the Folate Receptor-positive Circulating  
93 Tumor Cells (FR<sup>+</sup>-CTCs) Detection Kit (Geno Biotech Co. Ltd., Hong Kong, China),  
94 which has been approved by the China Food and Drug Administration (CFDA). The  
95 enrichment of CTCs is initially achieved by lysing erythrocytes, followed by  
96 immuno-magnetic depletion of leukocytes from the whole blood. Then, FR<sup>+</sup> CTCs in  
97 each sample are quantified by ligand-targeted polymerase chain reaction (LT-PCR) as  
98 published before.<sup>26</sup> The primer sequences are listed as follows: detection probe (an  
99 oligonucleotide that is conjugated to the tumor-specific ligand folic acid), 5'-CTCAA  
100 CTGGT GTCGT GGAGT CGGCA ATTCA GTTGA GGGTT CTAA-3'; forward primer,  
101 5'-TATGA TTATG AGGCA TGA-3'; reverse primer, 5'-GGTGT CGTGG AGTCG-3';  
102 TaqMan probe, 5'-FAM-CAGTT GAGGG TTC-MGB-3'. The LT-PCR reaction is  
103 performed on an ABI StepOne instrument as follows: denaturation at 95°C for 2  
104 minutes, annealing at 40°C for 30 seconds, extension at 72°C for 30 seconds, and  
105 then cooling at 8°C for 5 minutes; 40 cycles of denaturation at 95°C for 10 seconds,  
106 annealing at 35°C for 30 seconds, and extension at 72°C for 10 seconds. A  
107 self-referenced CTC unit (denoted "FU") derived from standard curve is used to  
108 indicate the abundance of FR<sup>+</sup>-CTCs in 3 mL peripheral blood. A serial of standards  
109 containing oligonucleotides ( $10^{-14}$  to  $10^{-9}$  M, corresponding to 2 to  $2 \times 10^5$  CTC units/3  
110 mL blood) are used for FR<sup>+</sup>-CTC quantification.

111 *Outcome assessment*

112 The primary endpoints are the differences in the level of FR<sup>+</sup>CTCs detected before  
113 and after surgery in the two groups. Secondary endpoints are disease-free survival  
114 and overall survival.

115 *Follow-up strategy*

116 All patients visit the surgical outpatient office one month after surgery for follow-up  
117 assessment. Patients are then evaluated every three to six months during the first two  
118 years, every six-month intervals in the next three years and annually thereafter.  
119 During routine follow-up, physical examination, chest and abdominal CT scans, and  
120 brain CT or MRI scan are performed. SPECT bone scan is performed once a year,  
121 and PET-CT is also conducted if necessary. Telephone follow-up is conducted if the  
122 outpatient follow-up is not available.

123 *Statistical analysis*

124 Continuous data are presented in means and compared using Student's t-test in case  
125 of normal distribution, and described in median and compared using Mann-Whitney  
126 *U*-test if non-normal distribution. Categorical data are presented in counts and  
127 percentages and compared with  $\chi$ -square test or the Fisher's exact test according to  
128 the cell size examined among groups. Logistic regression is performed to examine the  
129 risk factors associated with the change of FR<sup>+</sup> CTC levels during surgery. Survival  
130 curves are estimated by the Kaplan-Meier method and compared by the log-rank test.  
131 Factors potentially affecting the survival are assessed by univariable and multivariable  
132 Cox regression analysis.

133 *Clinical trial registry*

134 This trial was registered at the *ClinicalTrials.gov* (NCT03436329).

135

#### 136 **Funding**

137 This study was supported by the National Natural Science Foundation of China  
138 (NSFC 81672311) and the Key Science and Technology Support Program of Sichuan  
139 Province, China (No. 2016FZ0118).

140

#### 141 **Conflict of interest statement**

142 None declared.

143

#### 144 **References**

145 1 Cristofanilli M, Budd G T, Ellis M J, et al. Circulating tumor cells, disease  
146 progression, and survival in metastatic breast cancer. *N Engl J Med* 2004; **351**:  
147 781-791.

148 2 Wülfing P, Borchard J, Buerger H, et al. HER2-positive circulating tumor cells  
149 indicate poor clinical outcome in stage I to III breast cancer patients. *Clin Cancer*  
150 *Res* 2006; **12**: 1715-20.

151 3 Pierga J Y, Bidard F C, Mathiot C, et al. Circulating tumor cell detection predicts  
152 early metastatic relapse after neoadjuvant chemotherapy in large operable and  
153 locally advanced breast cancer in a phase II randomized trial. *Clin Cancer Res* 2008;  
154 **14**: 7004-10.

- 155 4 Krebs M G, Sloane R, Priest L, et al. Evaluation and prognostic significance of  
156 circulating tumor cells in patients with non–small-cell lung cancer. *J Clin Oncol* 2011;  
157 **29**: 1556-63.
- 158 5 Alix-Panabières C, Pantel K. Challenges in circulating tumor cell research. *Nat Rev*  
159 *Cancer* 2014; **14**: 623-31.
- 160 6 Weitz J, Kienle P, Lacroix J, et al. Dissemination of tumor cells in patients  
161 undergoing surgery for colorectal cancer. *Clin Cancer Res* 1998; **4**: 343-8.
- 162 7 Yamaguchi K, Takagi Y, Aoki S, Futamura M, Saji S. Significant detection of  
163 circulating cancer cells in the blood by reverse transcriptase–polymerase chain  
164 reaction during colorectal cancer resection. *Ann Surg* 2000; **232**: 58-65.
- 165 8 Miyazono F, Takao S, Natsugoe S, et al. Molecular detection of circulating cancer  
166 cells during surgery in patients with biliary-pancreatic cancer. *Am J Surg* 1999; **177**:  
167 475-9.
- 168 9 Sawabata N, Okumura M, Utsumi T, et al. Circulating tumor cells in peripheral blood  
169 caused by surgical manipulation of non-small-cell lung cancer: pilot study using an  
170 immunocytology method. *Gen Thorac Cardiovasc Surg* 2007; **55**: 189-92.
- 171 10 Hashimoto M, Tanaka F, Yoneda K, et al. Significant increase in circulating tumor  
172 cells in pulmonary venous blood during surgical manipulation in patients with  
173 primary lung cancer. *Interact Cardiovasc Thorac Surg* 2014; **18**: 775-83.
- 174 11 Turnbull RB Jr, Kyle K, Watson FR, Spratt J. Cancer of the colon: the influence of  
175 the no-touch isolation technic on survival rates. *Ann Surg* 1967; **166**: 420-7.
- 176 12 Turnbull RB Jr, Kyle K, Watson FR, Spratt J. Cancer of the colon: The influence of



177 the no - touch isolation technic on survival rates. *CA Cancer J Clin* 1968; **18**: 82-7.

178 13 Sales JP, Wind P, Douard R, Cugnenc PH, Loric S. Blood dissemination of colonic  
179 epithelial cells during no-touch surgery for rectosigmoid cancer. *Lancet* 1999; **354**:  
180 392.

181 14 Takii Y, Shimada Y, Moriya Y, et al. A randomized controlled trial of the conventional  
182 technique versus the no-touch isolation technique for primary tumor resection in  
183 patients with colorectal cancer: Japan Clinical Oncology Group Study JCOG1006.  
184 *Jpn J Clin Oncol* 2013; **44**: 97-100.

185 15 Liu CL, Fan ST, Lo CM, Tung-Ping Poon R, Wong J. Anterior approach for major  
186 right hepatic resection for large hepatocellular carcinoma. *Ann Surg* 2000; **232**:  
187 25-31.

188 16 Liu CL, Fan ST, Cheung ST, Lo CM, Ng IO, Wong J. Anterior approach versus  
189 conventional approach right hepatic resection for large hepatocellular carcinoma: a  
190 prospective randomized controlled study. *Ann Surg* 2006; **244**: 194-203.

191 17 Hirota M, Kanemitsu K, Takamori H, et al. Pancreatoduodenectomy using a  
192 no-touch isolation technique. *Am J Surg* 2010; **199**: e65-8.

193 18 Kuroki T, Eguchi S. No-touch isolation techniques for pancreatic cancer. *Surg*  
194 *Today* 2017; **47**: 8-13.

195 19 Gall T M H, Jacob J, Frampton A E, et al. Reduced dissemination of circulating  
196 tumor cells with no-touch isolation surgical technique in patients with pancreatic  
197 cancer. *JAMA Surg* 2014; **149**: 482-5.

198 20 Kurusu Y, Yamashita J, Hayashi N, Mita S, Fujino N, Ogawa M. The sequence of

199 vessel ligation affects tumor release into the circulation. *J Thorac Cardiovasc Surg*  
200 1998; **116**: 107-13.

201 21 McCulloch P, Choy A, Martin L. Association between tumor angiogenesis and  
202 tumor cell shedding into effluent venous blood during breast cancer surgery.  
203 *Lancet* 1995; **346**: 1334-5.

204 22 Roberts TE, Hasleton PS, Musgrove C, Swindell R, Lawson RA. Vascular invasion  
205 in non-small cell lung carcinoma. *J Clin Pathol* 1992; **45**: 591-3.

206 23 Bodendorf MO, Haas V, Laberke HG, Blumenstock G, Wex P, Graeter T.  
207 Prognostic value and therapeutic consequences of vascular invasion in non-small  
208 cell lung carcinoma. *Lung Cancer* 2009; **64**: 71-8.

209 24 Funaki S, Sawabata N, Abulaiti A, et al. Significance of tumor vessel invasion in  
210 determining the morphology of isolated tumor cells in the pulmonary vein in  
211 non-small-cell lung cancer. *Eur J Cardiothorac Surg* 2012; **43**: 1126-30.

212 25 Liu L, Che G, Pu Q, et al. A new concept of endoscopic lung cancer resection:  
213 Single-direction thoracoscopic lobectomy. *Surg Oncol* 2010; **19**: e71-7.

214 26 Chen X, Zhou F, Li X, et al. Folate receptor–positive circulating tumor cell detected  
215 by LT-PCR–based method as a diagnostic biomarker for non–small-cell lung  
216 cancer. *J Thorac Oncol* 2015; **10**: 1163-71.
