# Supplementary material
Source: PubMed Central journal article supplement (PMC6495366)
Supplement: jamasurg-154-e190972-s002.pdf [file jamasurg-154-e190972-s002.pdf]

## Supplementary Online Content

Wei S, Guo C, He J, et al. Effect of vein-first vs artery-first surgical technique on circulating tumor cells and survival in patients with non-small cell lung cancer: a randomized clinical trial and registry-based propensity score matching analysis. *JAMA Surg*. Published online May 1, 2019. doi:10.1001/jamasurg.2019.0972

**eTable 1.** Perioperative outcomes of the enrolled patients in the randomized clinical trial

**eTable 2.** Univariate and multivariate analyzes of factors that may increase the levels of FR<sup>+</sup>CTC

**eTable 3.** Baseline demographic and clinical characteristics of patients before propensity score matching in the retrospective analysis of the lung cancer registry

**eTable 4.** Comparison on perioperative outcomes of patients before propensity score matching in the retrospective analysis of the lung cancer registry

**eTable 5.** Baseline demographic and clinical characteristics of patients after propensity score matching in the retrospective analysis of the lung cancer registry

**eTable 6.** Comparison on perioperative outcomes of patients after propensity score matching in the retrospective analysis of the lung cancer registry

**eFigure 1.** The percentage of the changes of FR<sup>+</sup>CTC level during surgery in the A-first group and the V-first group.

**eFigure 2.** Study flow diagram of the enrolled patients and propensity matching in the lung cancer registry.

**eFigure 3.** Kaplan-Meier survival estimates for (A) 5-year overall survival (OS), (B) 5-year disease-free survival (DFS) and (C) 5-year lung cancer-specific survival (LCSS) in patients undergoing vein-first lobectomy or artery-first lobectomy. (HR, hazard ratio)

**eFigure 4.** Kaplan-Meier survival estimates for 5-year overall survival (OS), disease-free survival (DFS) and lung cancer-specific survival (LCSS) in patients with different stage diseases undergoing vein-first lobectomy or artery-first lobectomy.

This supplementary material has been provided by the authors to give readers additional information about their work.

**eTable 1 Perioperative outcomes of the enrolled patients in the randomized clinical trial**

| Characteristics                                                                    | V-first group<br>(n=38)     | A-first group<br>(n=40)     | <i>P</i><br>value |
|------------------------------------------------------------------------------------|-----------------------------|-----------------------------|-------------------|
| Operative time (min, median, IQR)                                                  | 119 (100-150)               | 123 (110-155)               | 0.18              |
| Blood loss (ml, median, IQR)                                                       | 50 (20-55)                  | 50 (20-95)                  | 0.95              |
| Post-operative length of stay (day, median, IQR)                                   | 6 (5-8)                     | 6 (5-7)                     | 0.99              |
| Drainage time (day, median, IQR)                                                   | 3 (3-4)                     | 3 (2-5)                     | 0.70              |
| Post-operative complications (n, %)                                                | 5 (13.2)                    | 5 (12.5)                    | 0.93              |
| Difference in FR <sup>+</sup> CTC levels after surgery (FU/3mL, median, IQR)       | -0.50<br>(-2.53+0.79)       | +0.73<br>(-0.86+1.58)       | 0.006             |
| %Change of FR <sup>+</sup> CTC levels (% median, IQR)                              | -4.18<br>(-16.12-<br>+6.26) | +6.23<br>(-4.73-<br>+11.88) | 0.002             |
| Number of patients with FR <sup>+</sup> CTC levels increasing after surgery (n, %) | 12 (31.6)                   | 26 (65.0)                   | 0.003             |

Abbreviations: IQR, interquartile range; FR<sup>+</sup>CTC, Folate Receptor-positive Circulating Tumor Cell.

**eTable 2 Univariate and multivariate analyzes of factors that may increase the levels of FR+CTC**

| Covariates                       | Univariate analysis |               |                | Multivariate analysis |               |                |
|----------------------------------|---------------------|---------------|----------------|-----------------------|---------------|----------------|
|                                  | HR                  | 95%CI         | <i>P</i> value | HR                    | 95%CI         | <i>P</i> value |
| <b>Age</b>                       |                     |               |                |                       |               |                |
| < 60 years old                   | Reference           |               |                | Reference             |               |                |
| ≥ 60 years old                   | 3.18                | 1.01 to 10.04 | 0.05           | 3.19                  | 0.95 to 10.72 | 0.06           |
| <b>Sex</b>                       |                     |               |                |                       |               |                |
| Female                           | Reference           |               |                |                       |               |                |
| Male                             | 1.02                | 0.41 to 2.53  | 0.96           |                       |               |                |
| <b>Comorbidity</b>               |                     |               |                |                       |               |                |
| No                               | Reference           |               |                |                       |               |                |
| Yes                              | 1.01                | 0.41 to 2.47  | 0.98           |                       |               |                |
| <b>Current or former smokers</b> |                     |               |                |                       |               |                |
| No                               | Reference           |               |                |                       |               |                |
| Yes                              | 1.67                | 0.68 to 4.09  | 0.27           |                       |               |                |
| <b>Tumor location</b>            |                     |               |                |                       |               |                |
| Left lobe                        | Reference           |               |                |                       |               |                |
| Right lobe                       | 2.53                | 0.98 to 6.56  | 0.06           |                       |               |                |
| <b>Sequence of</b>               |                     |               |                |                       |               |                |

|                               |           |                  |       |               |                  |       |
|-------------------------------|-----------|------------------|-------|---------------|------------------|-------|
| <b>vessel ligation</b>        |           |                  |       |               |                  |       |
| V-first                       | Reference |                  |       | Referenc<br>e |                  |       |
| A-first                       | 4.02      | 1.57 to<br>10.34 | 0.004 | 4.03          | 1.53 to<br>10.63 | 0.005 |
| <b>Tumor size</b>             |           |                  |       |               |                  |       |
| < 3cm                         | Reference |                  |       |               |                  |       |
| ≥ 3cm                         | 1.23      | 0.51 to<br>2.99  | 0.65  |               |                  |       |
| <b>Histological type</b>      |           |                  |       |               |                  |       |
| Adenocarcino<br>ma            | Reference |                  |       |               |                  |       |
| Non-<br>adenocarcinom<br>a    | 1.79      | 0.66 to<br>4.87  | 0.25  |               |                  |       |
| <b>Pathological TNM stage</b> |           |                  |       |               |                  |       |
| Stage I                       | Ref       |                  |       |               |                  |       |
| Stage II                      | 2.57      | 0.83 to<br>7.93  | 0.10  |               |                  |       |
| Stage III                     | 2.14      | 0.68 to<br>6.80  | 0.20  |               |                  |       |
| Stage IV                      | -         | -                | -     |               |                  |       |

Abbreviations: FR<sup>+</sup>CTC, Folate Receptor-positive Circulating Tumor Cell; HR, hazard ratio; CI, confidence interval.

**eTable 3 Baseline demographic and clinical characteristics of patients before propensity score matching in the retrospective analysis of the lung cancer registry**

| Characteristics                  | V-first group<br>(n=1,481) | A-first<br>group<br>(n=210) | <i>P</i><br>value |
|----------------------------------|----------------------------|-----------------------------|-------------------|
| Age (n, %)                       |                            |                             | 0.09              |
| < 60 years old                   | 739 (49.9)                 | 118 (56.2)                  |                   |
| ≥ 60 years old                   | 742 (50.1)                 | 92 (43.8)                   |                   |
| Sex (n, %)                       |                            |                             | 0.39              |
| Male                             | 799 (54.0)                 | 120 (57.1)                  |                   |
| Female                           | 682 (46.0)                 | 90 (42.9)                   |                   |
| Comorbidity (n, %)               |                            |                             | 0.009             |
| No                               | 747 (50.4)                 | 126 (60.0)                  |                   |
| Yes                              | 734 (49.6)                 | 84 (40.0)                   |                   |
| Current or former smokers (n, %) |                            |                             | 0.15              |
| No                               | 860 (58.1)                 | 111 (52.9)                  |                   |
| Yes                              | 621 (41.9)                 | 99 (47.1)                   |                   |
| Family cancer history (n, %)     |                            |                             | 0.78              |
| No                               | 1,230 (83.1)               | 176 (83.8)                  |                   |
| Yes                              | 251 (16.9)                 | 34 (16.2)                   |                   |
| Tumor location (n, %)            |                            |                             | 0.55              |
| Right lobe                       | 856 (57.8)                 | 126 (60.0)                  |                   |
| Left lobe                        | 625 (42.2)                 | 84 (40.0)                   |                   |
| Tumor size (n, %)                |                            |                             | 0.67              |
| < 3cm                            | 799 (54.0)                 | 110 (52.4)                  |                   |
| ≥ 3cm                            | 682 (46.0)                 | 100 (47.6)                  |                   |
| Histological type (n, %)         |                            |                             | 0.15              |
| Adenocarcinoma                   | 1,126 (76.0)               | 150 (71.4)                  |                   |
| Non-adenocarcinoma               | 355 (24.0)                 | 60 (28.6)                   |                   |

|                                        |              |            |      |
|----------------------------------------|--------------|------------|------|
| Pathological T stage (n, %)            |              |            | 0.69 |
| T1                                     | 240 (16.2)   | 36 (17.1)  |      |
| T2                                     | 1,184 (80.0) | 169 (80.5) |      |
| T3                                     | 51 (3.4)     | 4 (1.9)    |      |
| T4                                     | 6 (0.4)      | 1 (0.5)    |      |
| Lymph node metastasis (n, %)           |              |            | 0.14 |
| N0                                     | 1,033 (69.7) | 138 (65.7) |      |
| N1                                     | 179 (12.1)   | 22 (10.5)  |      |
| N2                                     | 269 (18.2)   | 50 (23.8)  |      |
| Pathological stage (n, %)              |              |            | 0.15 |
| Stage I                                | 957 (64.6)   | 128 (61.0) |      |
| Stage II                               | 241 (16.3)   | 30 (14.2)  |      |
| Stage III                              | 283 (19.1)   | 52 (24.8)  |      |
| Post-operative adjuvant therapy (n, %) |              |            | 0.33 |
| No                                     | 737 (49.8)   | 112 (53.3) |      |
| Yes                                    | 744 (50.2)   | 98 (46.7)  |      |

**eTable 4 Comparison on perioperative outcomes of patients before propensity score matching in the retrospective analysis of the lung cancer registry**

| Characteristics                                  | V-first group<br>(n=1,481) | A-first group<br>(n=210) | <i>P</i> value |
|--------------------------------------------------|----------------------------|--------------------------|----------------|
| Operative time (min, median, IQR)                | 130 (105-165)              | 165 (130-205)            | <0.001         |
| Blood loss (ml, median, IQR)                     | 50 (30-100)                | 60 (50-100)              | 0.007          |
| Post-operative length of stay (day, median, IQR) | 6 (5-8)                    | 6 (5-8)                  | 0.56           |
| Drainage time (day, median, IQR)                 | 3 (2-4)                    | 4 (3-6)                  | <0.001         |
| Post-operative complications (n, %)              | 241 (16.3)                 | 34 (16.2)                | 0.98           |

Abbreviations: IQR, interquartile range.

**eTable 5 Baseline demographic and clinical characteristics of patients after propensity score matching in the retrospective analysis of the lung cancer registry**

| Characteristics                  | V-first group<br>(n=210) | A-first group<br>(n=210) | <i>P</i> value |
|----------------------------------|--------------------------|--------------------------|----------------|
| Age (n, %)                       |                          |                          | 0.28           |
| < 60 years old                   | 129 (61.4)               | 118 (56.2)               |                |
| ≥ 60 years old                   | 81 (38.6)                | 92 (43.8)                |                |
| Sex (n, %)                       |                          |                          | 0.49           |
| Male                             | 113 (53.8)               | 120 (57.1)               |                |
| Female                           | 97 (46.2)                | 90 (42.9)                |                |
| Comorbidity (n, %)               |                          |                          | 0.77           |
| No                               | 123 (58.6)               | 126 (60.0)               |                |
| Yes                              | 87 (41.4)                | 84 (40.0)                |                |
| Current or former smokers (n, %) |                          |                          | 0.49           |
| No                               | 118 (56.2)               | 111 (52.9)               |                |
| Yes                              | 92 (43.8)                | 99 (47.1)                |                |
| Family cancer history (n, %)     |                          |                          | 0.70           |
| No                               | 173 (82.4)               | 176 (83.8)               |                |
| Yes                              | 37 (17.6)                | 34 (16.2)                |                |
| Tumor location (n, %)            |                          |                          | 0.19           |
| Right lobe                       | 139 (66.2)               | 126 (60.0)               |                |
| Left lobe                        | 71 (33.8)                | 84 (40.0)                |                |
| Tumor size (n, %)                |                          |                          | 0.56           |
| < 3cm                            | 116 (55.2)               | 110 (52.4)               |                |
| ≥ 3cm                            | 94 (44.8)                | 100 (47.6)               |                |
| Histological type (n, %)         |                          |                          | 0.44           |
| Adenocarcinoma                   | 157 (74.8)               | 150 (71.4)               |                |
| Non-adenocarcinoma               | 53 (25.2)                | 60 (28.6)                |                |
| Pathological T stage (n, %)      |                          |                          | 0.64           |
| T1                               | 36 (17.1)                | 36 (17.1)                |                |
| T2                               | 172 (81.9)               | 169 (80.5)               |                |



|                                        |            |            |      |
|----------------------------------------|------------|------------|------|
| T3                                     | 2 (1.0)    | 4 (1.9)    |      |
| T4                                     | 0 (0.0)    | 1 (0.5)    |      |
| Lymph node metastasis (n, %)           |            |            | 0.35 |
| N0                                     | 141 (67.2) | 138 (65.7) |      |
| N1                                     | 29 (13.8)  | 22 (10.5)  |      |
| N2                                     | 40 (19.0)  | 50 (23.8)  |      |
| Pathological stage (n, %)              |            |            | 0.37 |
| Stage I                                | 137 (65.2) | 128 (61.0) |      |
| Stage II                               | 33 (15.7)  | 30 (14.2)  |      |
| Stage III                              | 40 (19.1)  | 52 (24.8)  |      |
| Post-operative adjuvant therapy (n, %) |            |            | 0.70 |
| No                                     | 116 (55.2) | 112 (53.3) |      |
| Yes                                    | 94 (44.8)  | 98 (46.7)  |      |

**eTable 6 Comparison on perioperative outcomes of patients after propensity score matching in the retrospective analysis of the lung cancer registry**

| Characteristics                                  | V-first group<br>(n=210) | A-first group<br>(n=210) | <i>P</i> value |
|--------------------------------------------------|--------------------------|--------------------------|----------------|
| Operative time (min, median, IQR)                | 130 (100-165)            | 165 (130-205)            | <0.001         |
| Blood loss (ml, median, IQR)                     | 50 (30-100)              | 60 (50-100)              | 0.04           |
| Post-operative length of stay (day, median, IQR) | 6 (4-8)                  | 6 (5-8)                  | 0.18           |
| Drainage time (day, median, IQR)                 | 3 (2-5)                  | 4 (3-6)                  | 0.001          |
| Post-operative complications (n, %)              | 43 (20.5)                | 34 (16.2)                | 0.26           |

Abbreviations: IQR, interquartile range.

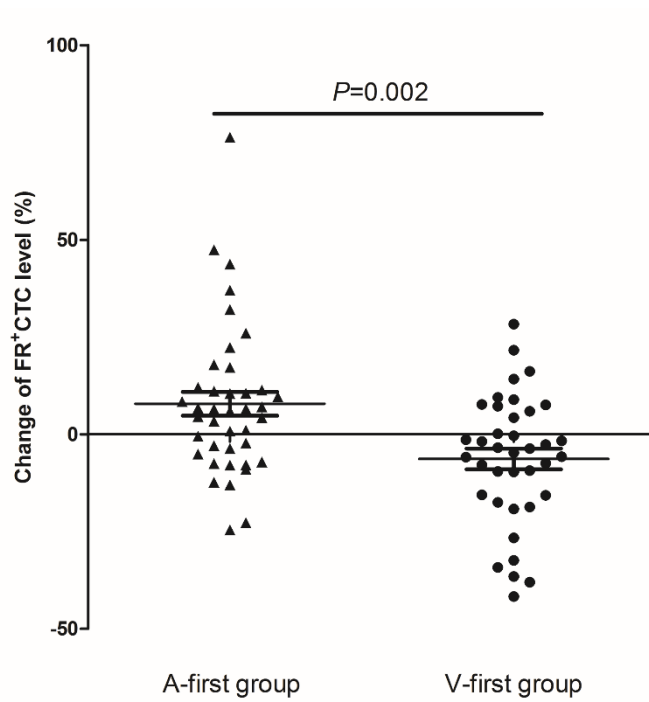

**eFigure 1.** The percentage of the changes of FR<sup>+</sup>CTC level during surgery in the A-first group and the V-first group.

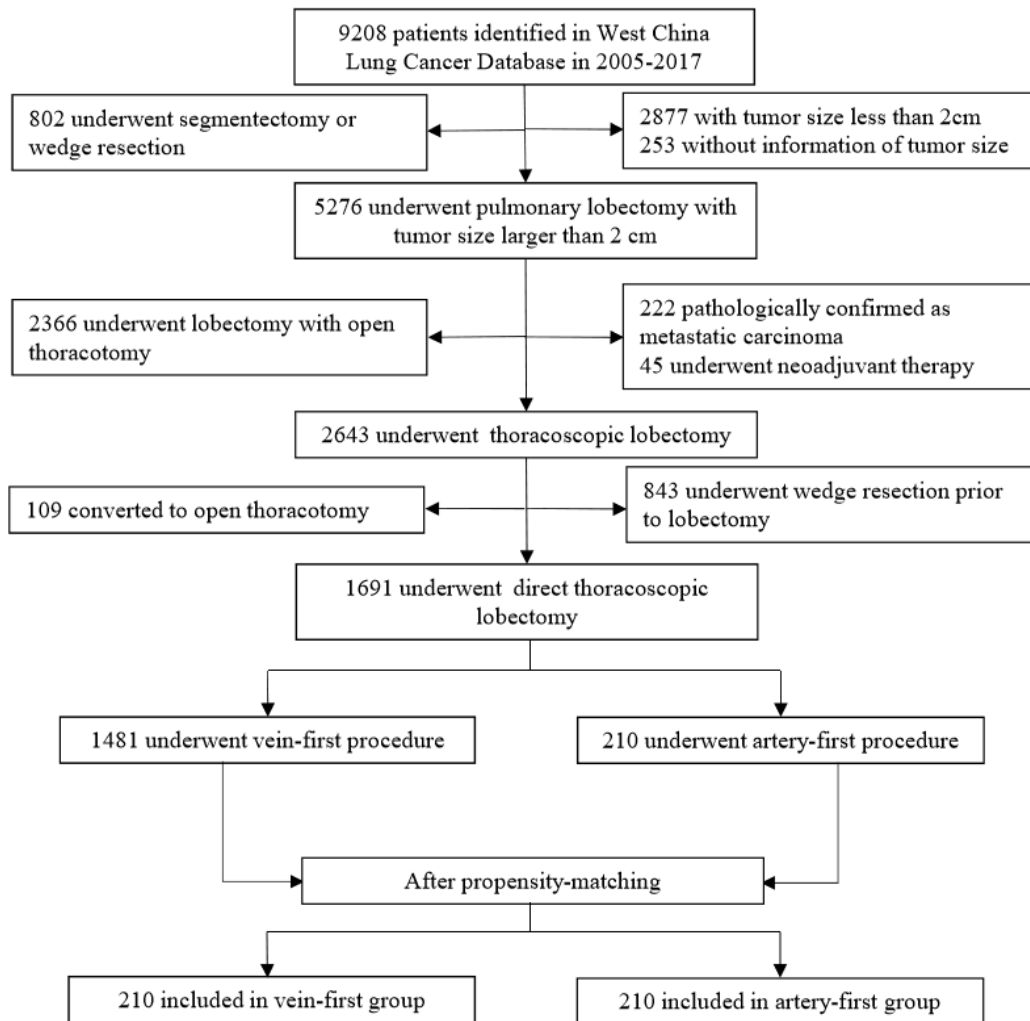

**eFigure 2.** Study flow diagram of the enrolled patients and propensity matching in the lung cancer registry.

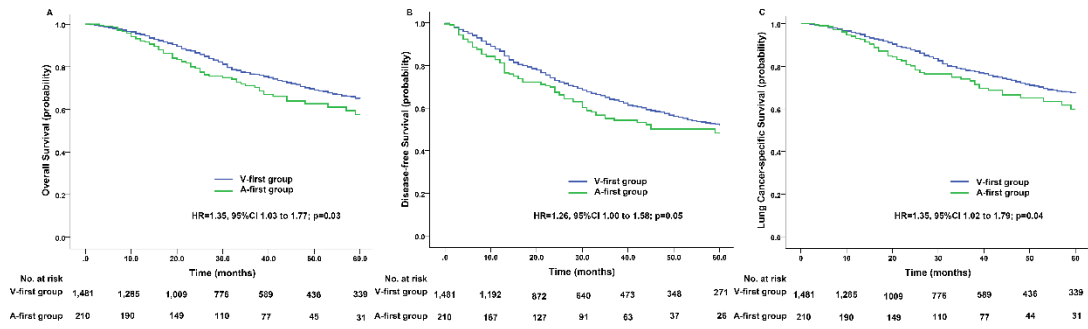

**eFigure 3.** Kaplan-Meier survival estimates for (A) 5-year overall survival (OS), (B) 5-year disease-free survival (DFS) and (C) 5-year lung cancer-specific survival (LCSS) in patients undergoing vein-first lobectomy or artery-first lobectomy. (HR, hazard ratio)

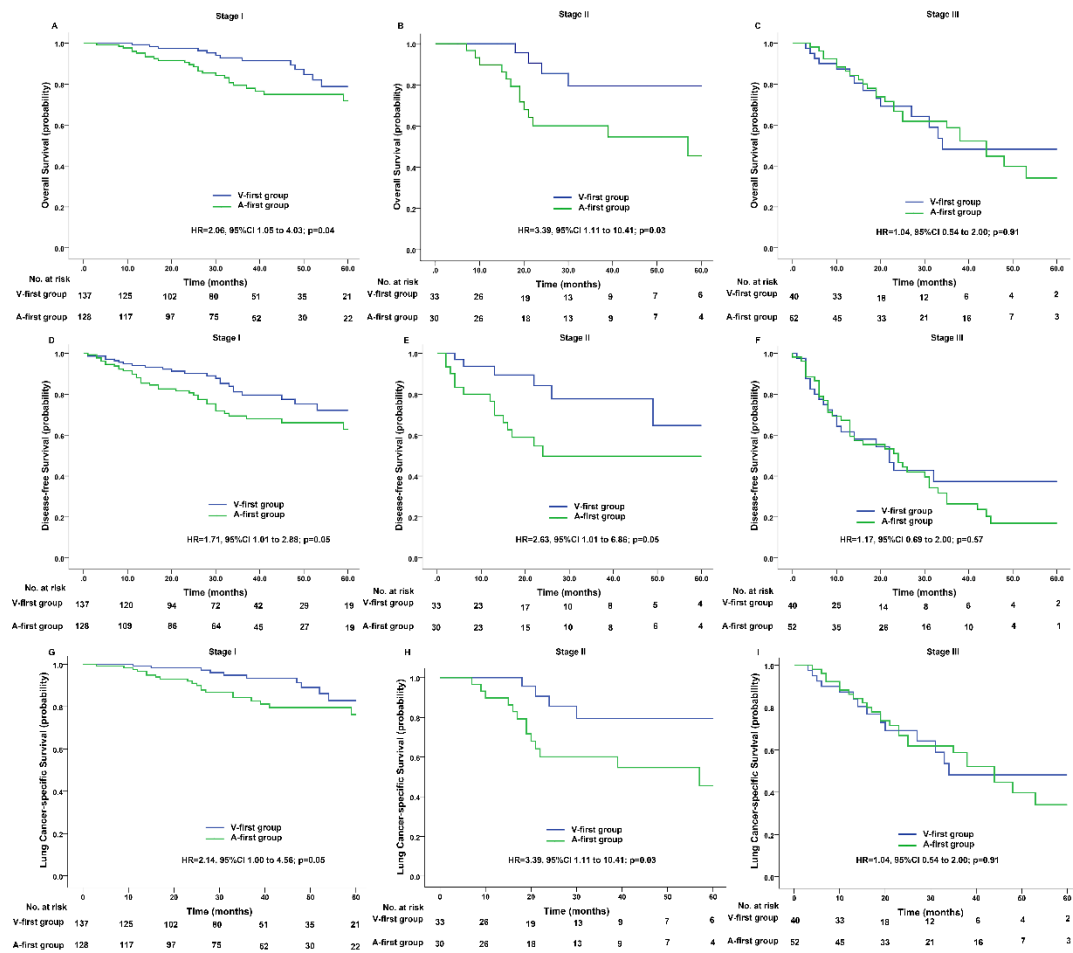

**eFigure 4.** Kaplan-Meier survival estimates for 5-year overall survival (OS), disease-free survival (DFS) and lung cancer-specific survival (LCSS) in patients with different stage diseases undergoing vein-first lobectomy or artery-first lobectomy. (A) OS of patients with stage I disease. (B) OS of patients with stage II disease. (C) OS of patients with stage III disease. (D) DFS of patients with stage I disease. (E) DFS of patients with stage II disease. (F) DFS of patients with stage III disease. (G) LCSS of patients with stage I disease. (H) LCSS of patients with stage II disease. (I) LCSS of patients with stage III disease. (HR, hazard ratio)
